## **A complex resistance locus in *Solanum americanum* recognizes a conserved *Phytophthora* effector**

Kamil Witek<sup>1#</sup>, Xiao Lin<sup>1#</sup>, Hari S Karki<sup>1#§</sup>, Florian Jupe<sup>1§</sup>, Agnieszka I Witek<sup>1</sup>, Burkhard Steuernagel<sup>2</sup>, Remco Stam<sup>3</sup>, Cock van Oosterhout<sup>4</sup>, Sebastian Fairhead<sup>1</sup>, Jonathan M Cocker<sup>5,6</sup>, Shivani Bhanvadia<sup>7</sup>, William Barrett<sup>1§</sup>, Chih-Hang Wu<sup>1§</sup>, Hiroaki Adachi<sup>1</sup>, Tianqiao Song<sup>1§</sup>, Sophien Kamoun<sup>1</sup>, Vivianne GAA Vleeshouwers<sup>7</sup>, Laurence Tomlinson<sup>1</sup>, Brande BH Wulff<sup>2</sup> and Jonathan DG Jones<sup>1\*</sup>

<sup>1</sup>The Sainsbury Laboratory, University of East Anglia, Norwich Research Park, Norwich, NR4 7UH, UK

<sup>2</sup>John Innes Centre, Norwich Research Park, Norwich, NR4 7UH, UK

<sup>3</sup>Phytopathology, Technical University Munich, 85354 Freising, Germany

<sup>4</sup>School of Environmental Sciences, University of East Anglia, Norwich Research Park, Norwich, NR4 7TJ, UK

<sup>5</sup>Faculty of Biological Sciences, University of Leeds, Leeds, LS2 9JT, UK

<sup>6</sup>University of Hull, Hull, HU6 7RX, UK

<sup>7</sup>Plant Breeding, Wageningen University and Research, Droevendaalsesteeg 1, 6708 PB, Wageningen, The Netherlands

#These authors contributed equally to this work

§Current addresses:

HSK: U.S. Department of Agriculture–Agricultural Research Service, Madison, WI 53706, U.S.A

FJ: Bayer Crop Science, Chesterfield, MO, USA

WB: The New Zealand Institute for Plant & Food Research Ltd, Nelson, New Zealand

CHW: Institute of Plant and Microbial Biology, Academia Sinica, Taiwan

TS: Institute of Plant Protection, Jiangsu Academy of Agricultural Sciences, Nanjing, 210014, P. R. China

\*Corresponding author: Jonathan D. G. Jones ([jonathan.jones@tsl.ac.uk](mailto:jonathan.jones@tsl.ac.uk))

## 1 **Abstract**

2

3 Late blight caused by *Phytophthora infestans* greatly constrains potato production.

4 Many *Resistance (R)* genes were cloned from wild *Solanum* species and/or introduced

5 into potato cultivars by breeding. However, individual *R* genes have been overcome by

6 *P. infestans* evolution; durable resistance remains elusive. We positionally cloned a

7 new *R* gene, *Rpi-amr1*, from *Solanum americanum*, that encodes an NRC helper-

8 dependent CC-NLR protein. *Rpi-amr1* confers resistance in potato to all 19 *P. infestans*

9 isolates tested. Using association genomics and long-read RenSeq, we defined eight

10 additional *Rpi-amr1* alleles from different *S. americanum* and related species. Despite

11 only ~90% identity between *Rpi-amr1* proteins, all confer late blight resistance but

12 differentially recognize *Avramr1* orthologs and paralogs. We propose that *Rpi-amr1*

13 gene family diversity facilitates detection of diverse paralogs and alleles of the

14 recognized effector, enabling broad-spectrum and durable resistance against *P.*

15 *infestans*.

16

17

18

19

20

21

22

23

24

25

26

27

28

29

30

31

32

33

34

## 35 **Introduction**

36

37 Potato is the fourth most important directly-consumed food crop world-wide<sup>1</sup>.  
38 *Phytophthora infestans*, an oomycete pathogen, causes late blight disease in potato, and  
39 can result in complete crop failure. Disease management is primarily based on repeated  
40 fungicide applications (10-25 times per season in Europe). However, fungicide-  
41 resistant races have emerged<sup>2</sup>.

42

43 To elevate late blight resistance, *Resistance to Phytophthora infestans (Rpi)* genes were  
44 identified in wild relatives of potato and used for resistance breeding<sup>3</sup>. More than 20  
45 *Rpi* genes have been mapped and cloned from different *Solanum* species<sup>4</sup>. All encode  
46 coiled-coil (CC), nucleotide binding (NB), leucine-rich repeat (LRR) (NLR) proteins<sup>5</sup>  
47 and some require helper NLR proteins of the NRC family<sup>6</sup>. However, most cloned *Rpi*  
48 genes have been broken by *P. infestans*<sup>7</sup>. Provision of durable late blight resistance for  
49 potato remains a major challenge.

50

51 NLR-mediated immunity upon effector recognition activates “effector-triggered  
52 immunity” (ETI)<sup>8</sup>. In oomycetes, all identified recognized effectors, or avirulence (*Avr*)  
53 genes, carry a signal peptide and an RxLR motif<sup>9</sup>. 563 RxLR effectors were predicted  
54 from the *P. infestans* genome, enabling identification of the recognized effectors<sup>10,11</sup>.  
55 Many *P. infestans* effectors show signatures of selection to evade recognition by  
56 corresponding NLR proteins<sup>12</sup>. NLR genes also show extensive allelic and  
57 presence/absence variation in wild plant populations<sup>13,14</sup> and known *Resistance (R)*  
58 gene loci like *Mla*, *L*, *Pi9*, *RPP1* and *RPP13* from barley, flax, rice and Arabidopsis  
59 show substantial allelic polymorphism<sup>15-18</sup>. Remarkably, different *Mla* alleles can  
60 recognize sequence-unrelated effectors<sup>19,20</sup>.

61

62 Technical advances like RenSeq (Resistance gene enrichment and Sequencing) and  
63 PenSeq (Pathogen enrichment Sequencing) enable rapid definition of allelic variation  
64 and mapping of plant *NLRs*, or discovery of variation in pathogen effectors<sup>21-23</sup>.  
65 Combined with single-molecule real-time (SMRT) sequencing, SMRT RenSeq enabled  
66 cloning of *Rpi-amr3* from *Solanum americanum*<sup>24</sup>. Similarly, long read and cDNA  
67 PenSeq enabled us to identify *Avramr1* from *P. infestans*<sup>25</sup>.

68

69 In this study, we further explored the genetic diversity of *S. americanum*, and by  
70 applying sequence capture technologies, we fine-mapped and cloned *Rpi-amr1* from *S.*  
71 *americanum*, (usually) located on the short arm of chromosome 11. Multiple *Rpi-amr1*  
72 homologs were found in different *S. americanum* accessions and in relatives, including  
73 *Solanum nigrescens* and *Solanum nigrum*. Functional alleles show extensive allelic  
74 variation and confer strong, broad-spectrum resistance to all 19 tested diverse *P.*  
75 *infestans* isolates. Although differential recognition was found between different *Rpi-*  
76 *amr1* and *Avramr1* homologs, all *Rpi-amr1* alleles recognize the *Avramr1* homologs  
77 from *Phytophthora parasitica* and *Phytophthora cactorum*. Our study reveals unique  
78 properties of genetic variation of *R* genes from “non-host” species.

79

## 80 **Results**

81

### 82 ***Rpi-amr1* maps to the short arm of chromosome 11**

83

84 We previously investigated *S. americanum* and isolated *Rpi-amr3* from an accession  
85 944750095 (SP1102)<sup>24</sup>. To discover new *Rpi-amr* genes, we characterized additional  
86 14 lines of *P. infestans*-resistant *S. americanum* and close relatives *S. nigrescens* and  
87 *Solanum nodiflorum* by crossing them to a susceptible (S) *S. americanum* line  
88 954750186 (hereafter SP2271) (Table 1). To avoid self-pollination, a resistant parent  
89 was always used as a pollen donor. All the corresponding F1 plants (6-10 per cross)  
90 were resistant in a detached leaf assay (DLA) (Table 1). Around 60-100 F2 progeny  
91 derived from each self-pollinated F1 plant were phenotyped by DLA using *P. infestans*  
92 isolate 88069<sup>26</sup>. The F2 progenies that derived from the resistant parents with working  
93 numbers SP1032, SP1034, SP1123, SP2272, SP2273, SP2360, SP3399, SP3400,  
94 SP3406, SP3408 and SP3409 segregated in a ratio suggesting the presence of a single  
95 (semi-) dominant resistance gene (fitting 3:1 or 2:1 [likely due to segregation distortion],  
96 R:S - resistant to susceptible - ratio). Two crosses showed a 15:1 segregation (resistant  
97 parent SP2300 and SP2307), suggesting the presence of two unlinked resistance genes,  
98 while SP1101 showed no susceptible plants in 100 individuals, suggesting the presence  
99 of three or more resistance genes.

100

101 **Table 1. *S. americanum*, *S. nodiflorum* and *S. nigrescens* accessions used in this**  
 102 **study and the corresponding *Rpi-amr1* homologs**

103

**Table 1**

| Accession | Working name | Species                                  | Reported origin | Source | Late blight resistance | <i>Rpi-amr1</i> homolog | Similarity | Cloning method       |
|-----------|--------------|------------------------------------------|-----------------|--------|------------------------|-------------------------|------------|----------------------|
| 954750186 | SP2271       | <i>S. americanum</i>                     | Brazil          | RU     | Susceptible            |                         |            |                      |
| 954750184 | SP2273       | <i>S. americanum</i> var. <i>patulum</i> | unknown         | RU     | Resistant              | <i>Rpi-amr1-2273</i>    | 100%       | Map-based cloning    |
| sn27      | SP1032       | <i>S. americanum sensu lato</i>          | China           | BGS    | Resistant              | <i>Rpi-amr1-1032</i>    | 92.8%      | Association genomics |
| Veg422    | SP1034       | <i>S. americanum sensu lato</i>          | unknown         | NN     | Resistant              | <i>Rpi-amr1-2273</i>    | 100%       | Association genomics |
| A54750014 | SP1101       | <i>S. americanum sensu lato</i>          | unknown         | RU     | Resistant              | <i>Rpi-amr1-1101</i>    | 89.4%      | SMRT RenSeq          |
| A14750006 | SP1123       | <i>S. americanum sensu lato</i>          | unknown         | RU     | Resistant              | <i>Rpi-amr1-1123</i>    | 91.8%      | Association genomics |
| 954750174 | SP2272       | <i>S. americanum</i>                     | unknown         | RU     | Resistant              | <i>Rpi-amr1-2272</i>    | 89.4%      | Association genomics |
| SOLA 226  | SP2300       | <i>S. americanum</i>                     | Cuba            | IPK    | Resistant              | <i>Rpi-amr1-2300</i>    | 90.4%      | SMRT RenSeq          |
| SOLA 425  | SP2307       | <i>S. americanum</i>                     | America         | IPK    | Resistant              | <i>Rpi-amr1-2307</i>    | 91.7%      | Association genomics |
| Wang 2059 | SP2360       | <i>S. americanum</i>                     | China           | NHM    | Resistant              | <i>Rpi-amr1-2273</i>    | 100%       | Association genomics |
| A14750138 | SP3399       | <i>S. americanum</i>                     | unknown         | RU     | Resistant              | <i>Rpi-amr1-2272</i>    | 89.4%      | Association genomics |
| A14750130 | SP3400       | <i>S. nodiflorum</i>                     | unknown         | RU     | Resistant              | <i>Rpi-amr1-2273</i>    | 100%       | Association genomics |
| 944750261 | SP3406       | <i>S. nigrescens</i>                     | Bolivia         | RU     | Resistant              | <i>Rpi-amr1-3406</i>    | 92.5%      | Association genomics |
| 954750172 | SP3408       | <i>S. nigrescens</i>                     | Bolivia         | RU     | Resistant              | <i>Rpi-amr1-3408</i>    | 92.6%      | Association genomics |
| A14750423 | SP3409       | <i>S. nigrescens</i>                     | Mauritius       | RU     | Resistant              | <i>Rpi-amr1-3409</i>    | 89.5%      | SMRT RenSeq          |

RU - Radboud University, Nijmegen, The Netherlands

IPK - IPK Gatersleben, Germany

NHM - Natural History Museum, London, United Kingdom

BGS - Shanghai Botanical Garden, Shanghai, China

NN - Nicky's Nursery Ltd, Kent, United Kingdom

104

105

106 To identify *Rpi* genes from these resistant *S. americanum* accessions, we prioritized an  
 107 F2 population derived from resistant parent SP2273 and named the corresponding gene  
 108 *Rpi-amr1*. Using markers from RenSeq, genotyping by sequencing (RAD markers) and  
 109 Whole Genome Shotgun sequencing (WGS), the *Rpi-amr1* gene was mapped in a small  
 110 population (n=188 gametes) to the short arm of chromosome 11, between markers  
 111 RAD\_3 and WGS\_1 (Fig. 1a, Table S1, S2). We expanded the mapping population and  
 112 developed a PCR marker WGS\_2 that co-segregated with resistance in 3,586 gametes  
 113 (Fig. 1b, Table S2). To generate the physical map of the target interval from SP2273, a  
 114 BAC library was generated. Two BAC clones (12H and 5G) covering the target interval  
 115 were isolated and sequenced on the PacBio RSII platform, and assembled into a single  
 116 contig of 212 kb (Fig. 1c). We predicted 11 potential coding sequences on the BAC\_5G,  
 117 nine of which encode *NLR* genes (Fig. 1c). These *NLR* genes belong to the CNL class  
 118 and have 80-96% between-paralog identity.

119 To define which of these *NLR* genes are expressed, cDNA RenSeq data of the resistant  
 120 parent SP2273 were generated and mapped to the BAC\_5G sequence. Seven out of nine  
 121 *NLR* genes were expressed. These genes - *Rpi-amr1a*, *b*, *c*, *d*, *e*, *g* and *h* - were tested  
 122 as candidate genes for *Rpi-amr1* (Fig. 1c).

123  
 124

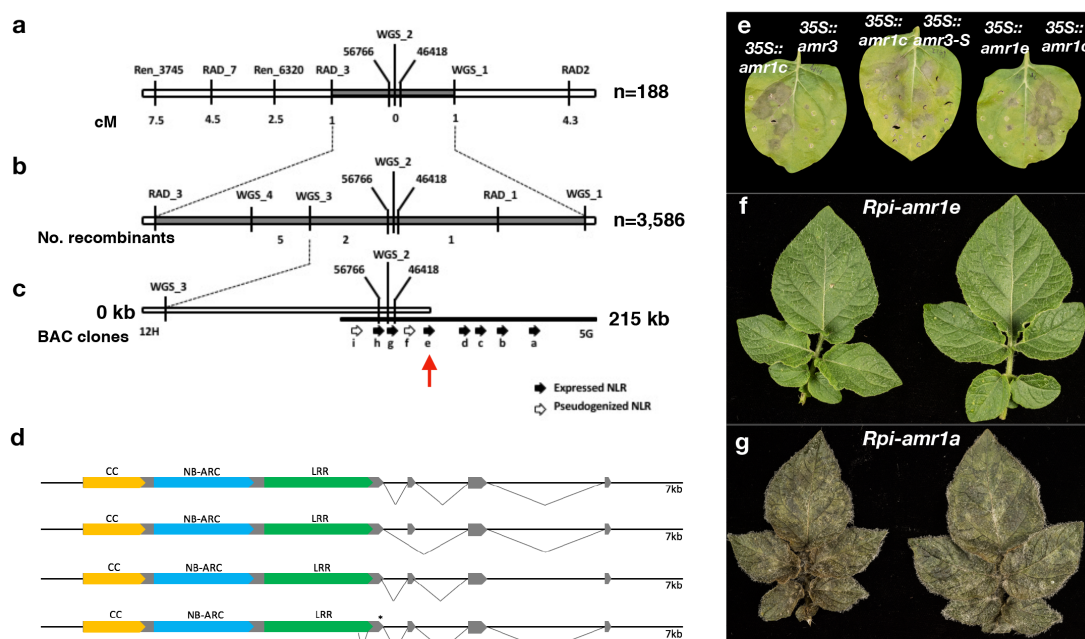

125

126 **Fig. 1. Map-based cloning of *Rpi-amr1* and its resistance to *P. infestans*.**

127 (a) Mapping of *Rpi-amr1* in a small F2 population (n=188 gametes); the names of the markers and  
 128 genetic distances are shown above or below the bar.  
 129 (b) Fine mapping of *Rpi-amr1* in the F2 population of 3,586 gametes. The names of the markers  
 130 and the number of recombinants are shown above or below the bar.  
 131 (c) Physical map of the target *Rpi-amr1* interval based on the assembled BAC contig. The markers  
 132 present on the BAC are shown. The predicted NLR genes are depicted as black arrows  
 133 (expressed NLRs) or empty arrows (pseudogenized NLRs). *Rpi-amr1* (formerly *Rpi-amr1e*) is  
 134 indicated by a red arrow.  
 135 (d) Four *Rpi-amr1* transcripts detected by 3' RACE PCR.  
 136 (e) Leaves of *N. benthamiana* plants were infiltrated with the binary vector  
 137 pICSLUS0003::35S overexpressing either the late blight resistance gene *Rpi-amr3* (positive  
 138 control), one of seven *Rpi-amr1* candidates, or the non-functional *Rpi-amr3-S* (negative  
 139 control). Leaves were inoculated with *P. infestans* strain 88069 24 h after infiltration. Only  
 140 leaves infiltrated with *Rpi-amr3* and *Rpi-amr1e* (pictured) showed reduced pathogen growth,  
 141 whereas *P. infestans* grew well in the presence of the remaining *Rpi-amr1* candidates.  
 142 Only *Rpi-amr1c* is shown as the phenotype of all other non-functional candidate genes was  
 143 indistinguishable. Photographs were taken 9 dpi.  
 144 (f) Transgenic potato cv. Maris Piper which expresses *Rpi-amr1* under the native regulatory  
 145 elements is resistant to *P. infestans* isolate 88069 (top), displaying no symptoms at the spot of  
 146 inoculation. Each leaflet was inoculated with a droplet containing approximately 1,000  
 147 zoospores; photographs were taken 9 dpi.  
 148 (g) The control plants carrying the non-functional candidate *Rpi-amr1a* show large necrotic lesions  
 149 and sporulation. Each leaflet was inoculated with a droplet containing approximately 1,000  
 150 zoospores; photographs were taken 9 dpi.

151

152 ***Rpi-amr1e* confers resistance in *Nicotiana benthamiana* and cultivated potato**

153

154 To test the function of the seven candidate genes, we cloned their open reading frames  
155 into a binary expression vector under control of the 35S promoter. *Rpi-amr3* was used  
156 as a positive control and the non-functional *Rpi-amr3-S* was used as a negative control.  
157 The constructs carrying each of the seven candidate genes were transiently expressed  
158 after *Agrobacterium* infiltration into *N. benthamiana* leaves, which were subsequently  
159 inoculated with the *P. infestans* isolate 88069 as described<sup>24</sup>. *P. infestans* growth was  
160 observed six days post inoculation (dpi). Only 35S::*Rpi-amr1e*-infiltrated leaves  
161 showed reduced pathogen growth at 6 dpi compared to other candidate genes like *Rpi-*  
162 *amr1c*, or negative control *Rpi-amr3-S*. (Fig. 1e). Hence, we conclude that *Rpi-amr1e*  
163 is the functional *Rpi-amr1* (hereafter) gene from *S. americanum* SP2273.

164

165 To test if *Rpi-amr1* confers late blight resistance in potato, we cloned it with its native  
166 promoter and terminator, and generated transgenic potato cultivar Maris Piper plants  
167 carrying *Rpi-amr1*. A non-functional paralog *Rpi-amr1a* was also transformed into  
168 Maris Piper as a negative control. As in the transient assay, stably transformed *Rpi-*  
169 *amr1* lines resisted *P. infestans* 88069 in potato (Fig. 1f), but *Rpi-amr1a*-transformed  
170 plants did not (Fig. 1g).

171

172 ***Rpi-amr1* is a four exon CC-NLR**

173

174 To characterize the structure of *Rpi-amr1*, we mapped the cDNA RenSeq data to the  
175 full length *Rpi-amr1* gene, and found four alternatively spliced forms of *Rpi-amr1*. The  
176 most abundant form, supported by >80% of reads, comprises four exons encoding a  
177 protein of 1,013 amino acids. This was confirmed with 3' RACE PCR (Fig. 1d). The  
178 *Rpi-amr1* is a typical CC-NB-LRR resistance protein, with a coiled-coil domain (CC;  
179 amino acids 2-146), nucleotide binding domain (NB-ARC; amino acids 179-457) and  
180 leucine-rich repeats (LRR; located between amino acids 504-900) which are all  
181 positioned in the first exon (1-918 aa, Fig. 2a). The remaining three short exons (amino  
182 acids 919-943, 944-1002 and 1,003-1,013) lack homology to any known domains. No  
183 integrated domains<sup>27</sup> were found in the *Rpi-amr1* protein.

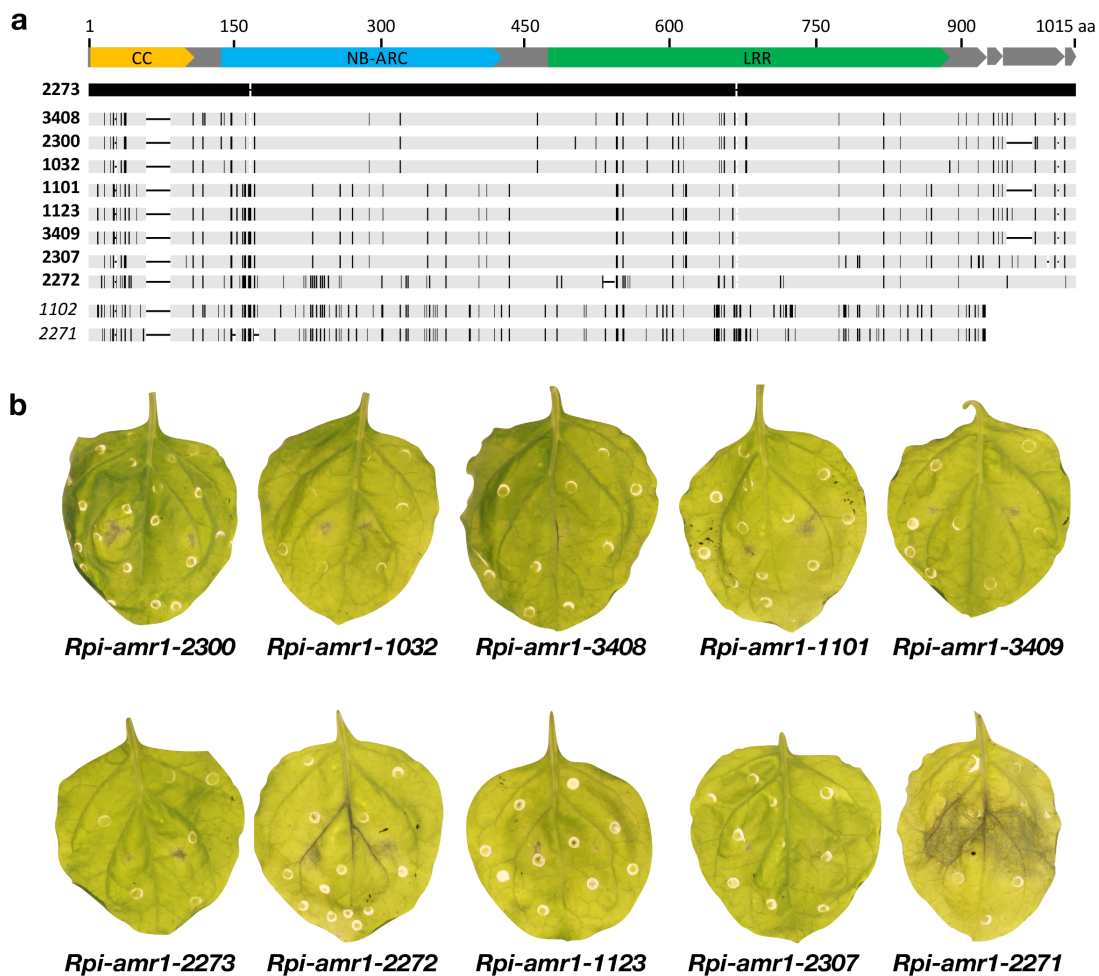

184

185 **Fig. 2. Schematic representation of amino acid sequence alignment of *Rpi-amr1***  
186 **homologs (a) and *P. infestans* resistance in transient assay (b).**

187

188 (a) The exons and the conserved NLR domains are highlighted at the top of the alignment (exons,  
189 grey; CC, orange; NB-ARC, blue; LRR, green). Black bars in the alleles indicate the  
190 polymorphic nucleotides and indels as compared with *Rpi-amr1-2273*. The numbers next to the  
191 alleles refer to the accession working numbers (Table 1). Figure drawn to the scale.

192 (b) Nine *Rpi-amr1* homologs provide resistance to *P. infestans* in transient complementation assay.  
193 *Rpi-amr1* genes with native regulatory elements were infiltrated into *N. benthamiana* leaves. At  
194 1 dpi, leaves were cut off and drop inoculated with 10  $\mu$ l of zoospore suspension (50,000/mL)  
195 from *P. infestans* isolate 88069. The non-functional *Rpi-amr1-2271* homolog from susceptible  
196 accession SP2271 was used as negative control. Photographs were taken 8 dpi.

197

198 **Functional *Rpi-amr1* homologs were identified from multiple resistant *S.***  
199 ***americanum* and relatives**

200

201 Previously, we found at least 14 *S. americanum* accessions and related species that  
202 resist late blight (Table 1). To test if *Rpi-amr1* contributes to late blight resistance in  
203 other resistant *S. americanum* accessions, we genotyped 10-50 susceptible F2 plants of



204 the populations derived from resistant accessions, with *Rpi-amr1* linked markers  
205 (markers 3745 and 56766, Fig. 1 and Table S2). We found that in SP1032, SP1034,  
206 SP1123, SP2272, SP2307, SP2360, SP3399, SP3400, SP3406 and SP3408, resistance  
207 is linked to the *Rpi-amr1* locus. To test if in these accessions the resistance is conferred  
208 by functional *Rpi-amr1* homologs, we performed SMRT RenSeq-based *de novo*  
209 assembly of each resistant accession, and looked for homologs with the greatest identity  
210 to *Rpi-amr1*. For accessions SP2307, SP3399 and SP3406, we also used cDNA RenSeq  
211 to monitor their expression. We mapped *de novo* contigs to the coding sequence of *Rpi-*  
212 *amr1* allowing for 15% mismatches and gaps, and selected the closest homolog as a  
213 candidate *Rpi-amr1* ortholog (Table S3). In three resistant parents, namely SP1034,  
214 SP2360 and SP3400, the functional alleles showed 100% identity at the amino acid  
215 level to *Rpi-amr1*, while amino acid sequences from the remaining accessions had as  
216 little as 89% identity to the functional *Rpi-amr1* (Table S3). As described previously,  
217 we transiently expressed the closest related candidate *Rpi-amr1* homologs in *N.*  
218 *benthamiana* leaves followed by DLA with *P. infestans* isolate 88069, and verified their  
219 functionality. The unique homologs of *Rpi-amr1-2273* were named as *Rpi-amr1-1032*,  
220 *Rpi-amr1-1123*, *Rpi-amr1-2272*, *Rpi-amr1-2307* and *Rpi-amr1-3408*.

221  
222 For some accessions, like SP1101 and SP2300, the *Rpi-amr1*-linked markers gave  
223 ambiguous results, so we directly performed bulked segregant analysis (BSA) and  
224 RenSeq. Additional *Rpi-amr1* co-segregating paralogs, *Rpi-amr1-1101* and *Rpi-amr1-*  
225 *2300*, were identified and verified in transient assays as above (Fig. 2b).

226  
227 Similarly, we inspected an F2 population derived from *S. nigrescens* accession SP3409  
228 (Table 1). We applied BSA RenSeq and SMRT RenSeq to the resistant parents and F2  
229 segregating population, and we found five candidate *NLRs* belonging to the same *Rpi-*  
230 *amr1* clade, all of which are expressed. The five candidates were cloned, and transient  
231 assays verified one of them as a functional *Rpi-amr1* homolog, *Rpi-amr1-3409*.  
232 However, *Rpi-amr1-3409* does not co-segregate with *Rpi-amr1*-linked markers. We  
233 used GenSeq sequence capture-based genotyping (Chen *et al.* 2018), and found that  
234 *Rpi-amr1-3409* locates on chromosome 1, based on the potato DM reference genome<sup>28</sup>.  
235 This result suggests that a fragment of DNA that locates on distal end of the short arm  
236 of chromosome 11 in other resistant accessions was translocated to the distal end of the  
237 long arm of chromosome 1 in SP3409.

238 When the full-length amino acid sequences of nine *Rpi-amr1* homologs were aligned,  
239 the polymorphisms between different functional alleles were found to be distributed  
240 through all domains including the LRR region (Fig. 2a and Fig. S1).

241

242 Taken together, by using BSA RenSeq, SMRT RenSeq, cDNA RenSeq, association  
243 genomics and GenSeq, we cloned eight additional functional *Rpi-amr1* homologs from  
244 different resistant accessions, of which all confer resistance to *P. infestans* 88069 in  
245 transient assays. The closest *Rpi-amr1* homolog from susceptible parent SP2271 does  
246 not confer resistance (Fig. 2b).

247

### 248 ***Rpi-amr1* is present in hexaploid *S. nigrum* accessions**

249

250 Most *S. nigrum* accessions are highly resistant to *P. infestans* and *S. nigrum* has been  
251 reported to be a “non-host” to *P. infestans*<sup>29</sup>, even though rare accessions are  
252 susceptible<sup>30</sup>. *S. americanum* may be the diploid ancestor of hexaploid *S. nigrum*<sup>31</sup>. To  
253 test if *Rpi-amr1* also contributes to late blight resistance in *S. nigrum*, we amplified and  
254 sequenced the first exon of *Rpi-amr1* from four resistant and one reported susceptible  
255 *S. nigrum* accessions<sup>30</sup>. From three resistant accessions (SP1095, SP1088 and SP1097;  
256 Table S4), we amplified sequences with >99% nucleotide identity to *S. americanum*  
257 *Rpi-amr1-2273* (Fig. S2). *Rpi-amr1-1104* was more polymorphic, with 96.7%  
258 nucleotide identity to *Rpi-amr1-2273*, and primers used for allele mining did not  
259 amplify anything from the susceptible line SP999. These data suggest that *Rpi-amr1*  
260 homologs are present in some *S. nigrum* accessions and were most likely inherited from  
261 *S. americanum*.

262

### 263 ***Rpi-amr1* confers broad-spectrum late blight resistance in cultivated potato**

264

265 To test the scope of late blight resistance conferred by *Rpi-amr1* and its homologs, we  
266 generated stably transformed transgenic potato cv Maris Piper plants carrying *Rpi-*  
267 *amr1-2272* and *Rpi-amr1-2273*, the most diverged of the homologs (Table S3), and  
268 inoculated them by DLA with 19 *P. infestans* isolates from UK, the Netherlands,  
269 Belgium, USA, Ecuador, Mexico and Korea (Table 2). Many of the tested *P. infestans*  
270 isolates can defeat multiple *Rpi* genes (Table 2). Our DLAs show that Maris Piper  
271 carrying *Rpi-amr1-2272* or *Rpi-amr1-2273* resist all 19 tested *P. infestans* isolates,

272 while the wild-type Maris Piper control is susceptible to all of them. This indicates that  
 273 *Rpi-amr1* confers broad-spectrum resistance against diverse *P. infestans* races.

274

275 **Table 2. Phenotypes of potato plants stably transformed with *Rpi-amr1-2272* and**  
 276 ***Rpi-amr1-2273* after inoculation with multiple isolates of *P. infestans*.**

277

| Isolate              | <i>Rpi-amr1-2272</i> | <i>Rpi-amr1-2273</i> | Maris Piper | Origin          | Race <sup>e</sup>                |
|----------------------|----------------------|----------------------|-------------|-----------------|----------------------------------|
| NL00228              | R                    | R                    | S           | The Netherlands | 1.2.4.7                          |
| US23                 | R                    | R                    | S           | USA             | n.a.                             |
| 3928A <sup>a</sup>   | R                    | R                    | S           | UK              | 1.2.3.4.5.6.7.10.11 <sup>f</sup> |
| EC3626 <sup>b</sup>  | R                    | R                    | S           | Ecuador         | n.a.                             |
| NL14538 <sup>c</sup> | R                    | R                    | S           | The Netherlands | n.a.                             |
| NR47UH <sup>d</sup>  | R                    | R                    | S           | UK              | 1.3.4.7.10.11 <sup>f</sup>       |
| T30-4                | R                    | R                    | S           | The Netherlands | n.a.                             |
| USA618               | R                    | R                    | S           | USA             | 1.2.3.6.7.10.11                  |
| KPI15-10             | R                    | R                    | S           | Korea           | n.a.                             |
| IPO-C                | R                    | R                    | S           | Belgium         | 1.2.3.4.5.6.7.10.11              |
| PIC99189             | R                    | R                    | S           | Mexico          | 1.2.5.7.10.11                    |
| UK7824               | R                    | R                    | S           | UK              | n.a.                             |
| PIC99177             | R                    | R                    | S           | Mexico          | 1.2.3.4.7.9.11                   |
| VK98014              | R                    | R                    | S           | The Netherlands | 1.2.4.11                         |
| NL08645              | R                    | R                    | S           | The Netherlands | n.a.                             |
| PIC99183             | R                    | R                    | S           | Mexico          | 1.2.3.4.5.7.8.10.11              |
| NL11179              | R                    | R                    | S           | The Netherlands | n.a.                             |
| EC1 <sup>b</sup>     | R                    | R                    | S           | Ecuador         | 1.3.4.7.10.11                    |
| NL01096              | R                    | R                    | S           | The Netherlands | 1.3.4.7.8.10.11                  |

278 <sup>a</sup> Clonal lineage EU\_13\_A2, or “Blue13”

279 <sup>b</sup> Overcomes *Rpi-vnt1*

280 <sup>c</sup> Overcomes *Rpi-vnt1* and partially *Rpi-blb1*, *Rpi-blb2*

281 <sup>d</sup> Clonal lineage EU\_6\_A1, commonly known as “Pink6”

282 <sup>e</sup> Summarized in<sup>32</sup>

283 <sup>f</sup> See<sup>33</sup>

284

285

## 286 **Differential recognition by *Rpi-amr1* alleles of *Avramr1* homologs**

287

288 *Avramr1* (PITG\_07569) was identified in *P. infestans* race T30-4 by long-read and  
289 cDNA PenSeq, and multiple *Avramr1* homologs were identified in four *P. infestans*  
290 isolates and classified into four subclades<sup>25</sup>. To investigate if all nine cloned *Rpi-amr1*  
291 homologs could recognize diverse *Avramr1* homologs from different *P. infestans*  
292 isolates, in addition to *Avramr1* from race T30-4 that corresponds to clade A, we  
293 synthesized three *Avramr1* homologs *Avramr1-13B1*, *Avramr1-13C2* and *Avramr1-*  
294 *13D1* from isolate 3928A (EU\_13\_A2, commonly known as “Blue 13”), corresponding  
295 to clades B, C and D, respectively (Fig. 3). We also synthesized the *Avramr1* homologs  
296 from *P. parasitica* and *P. cactorum*<sup>25</sup>. These six *Avramr1* homologs were co-expressed  
297 in *N. benthamiana* by agro-infiltration in all possible combinations with nine functional  
298 *Rpi-amr1* homologs and the non-functional *Rpi-amr1-2271* as a negative control (Fig.  
299 3).

300

301 We found that different combinations of *Rpi-amr1* alleles and *Avramr1* homologs led  
302 either to strong, weak or no HR phenotype in transient assay, but the non-functional  
303 *Rpi-amr1-2271* allele failed to recognize any *Avramr1* homologs (Fig. 3). *Rpi-amr1-*  
304 *2300* and *Rpi-amr1-2307* recognized one *Avramr1* homolog each, but others detected  
305 *Avramr1* homologs from more than one clade. Clade C, represented here by *Avramr1-*  
306 *13C2*, is usually not expressed<sup>25</sup>, and when expressed from 35S promoter, this effector  
307 was not recognized by most *Rpi-amr1* homologs, though a weak HR was observed upon  
308 co-expression with *Rpi-amr1-2272*. *Avramr1-13D1* belongs to Clade D, which is  
309 absent in T30-4 but present in four other sequenced isolates<sup>25</sup>, and was recognized by  
310 all but one (*Rpi-amr1-2300*) homologs in the transient assay. Surprisingly, two  
311 *Avramr1* homologs from *P. parasitica* and *P. cactorum* are strongly recognized by all  
312 functional *Rpi-amr1* homologs, apart from *Rpi-amr1-2272* which showed a weaker HR  
313 (Fig. 3).

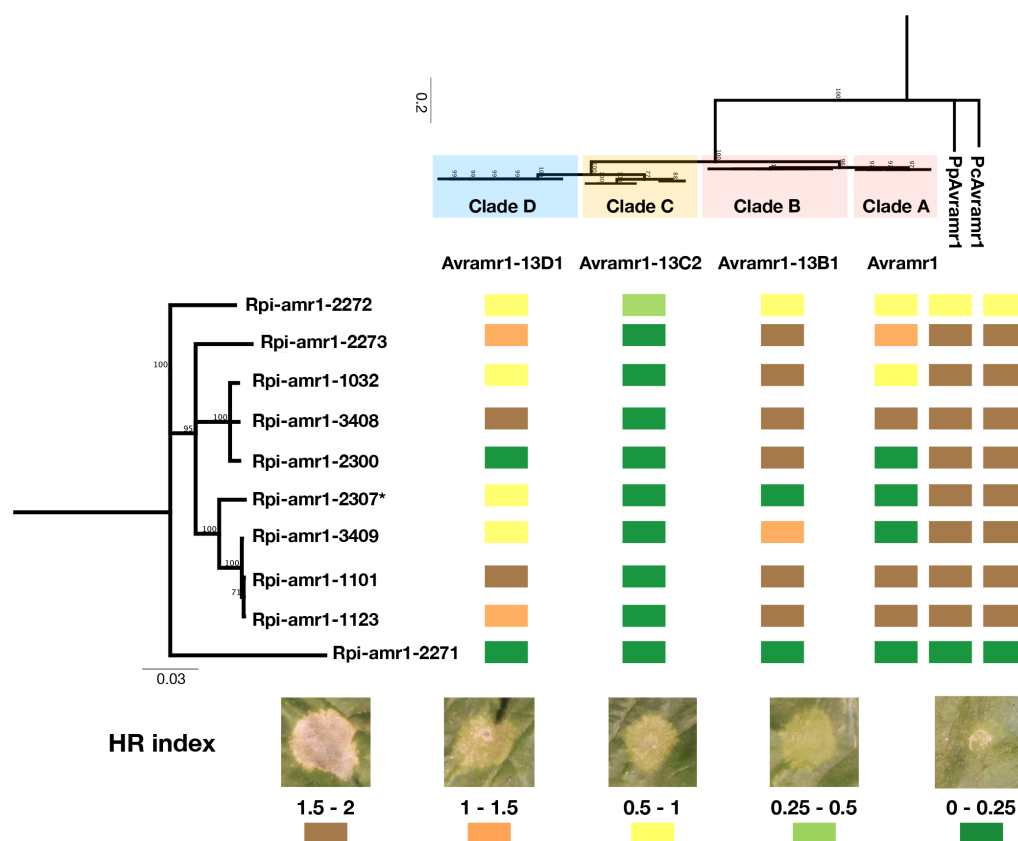

314

315 **Fig. 3. Differential recognition of *Rpi-amr1* and *Avramr1* homologs.**

316 Four *Avramr1* homologs representing clades A-D, and *P. parasitica* and *P. cactorum* homologs were co-  
 317 infiltrated with ten *Rpi-amr1* homologs, including a non-functional homolog *Rpi-amr1-2271*, into *N.*  
 318 *benthamiana* leaves. Colours from green to brown represent the strength of HR scored from 0 to 2 (see  
 319 bottom panel). N=3.

320 Left: phylogenetic tree of nine functional *Rpi-amr1* homologs and non-functional homolog *Rpi-amr1-*  
 321 *2271*. Top: phylogenetic tree of *Avramr1* homologs from four isolates of *P. infestans*.

322 \* Stable *Rpi-amr1-2307* *N. benthamiana* transformants show HR upon transient expression of *Avramr1*  
 323 and *Avramr1-13B1*.

324

325 Collectively, our data shows that *Rpi-amr1/Avramr1* homolog pairs provoke  
 326 quantitatively and qualitatively different HRs, but all functional *Rpi-amr1* homologs  
 327 detect at least one *Avramr1* homolog from *P. infestans* isolate 3928A.

328

329 **Both *Rpi-amr1*-mediated resistance and effector recognition are NRC2 or NRC3**  
 330 **dependent**

331

332 We generated a phylogenetic tree for representative *Solanaceae* NLR proteins. *Rpi-*  
 333 *amr1* is grouped with clade CNL-3, from which no functional resistance genes were  
 334 previously cloned (Fig. 4a). This phylogenetic affiliation suggested that *Rpi-amr1* is

335 likely to depend on the helper NRC clade because CNL-3 is among the large super-  
336 clade of NRC-dependent sensors (Fig. 4a)<sup>6</sup>.

337 To test this hypothesis, we transiently expressed *Rpi-amr1-2273* together with  
338 *PpAvramr1* in NRC4, NRC2/3 or NRC2/3/4 knock out *N. benthamiana* leaves<sup>34,35</sup> (Fig.  
339 S3). The HR phenotype was abolished in NRC2/3 and NRC2/3/4 knockout plants (Fig.  
340 S4 c and b), but not in NRC4 knock-out or wild-type plants (Fig. S4 d and a). The HR  
341 was recovered when NRC2 or NRC3 was co-expressed in the NRC2/3/4 or NRC2/3  
342 knock out plants, but co-expression of NRC4 did not complement the loss of HR  
343 phenotype in NRC2/3/4 knockout plants. (Fig. S4 b and c). We further showed that also  
344 *Rpi-amr1* mediated resistance is dependent on NRC2 or NRC3 but not NRC4, as  
345 transient expression of *Rpi-amr1-2273* followed by *P. infestans* infection restricted  
346 pathogen growth only in NRC4 knockout *N. benthamiana* plants (Fig. 4b). These data  
347 indicate that both the effector recognition and resistance conferred by *Rpi-amr1* is  
348 NRC2 or NRC3 dependent.

349

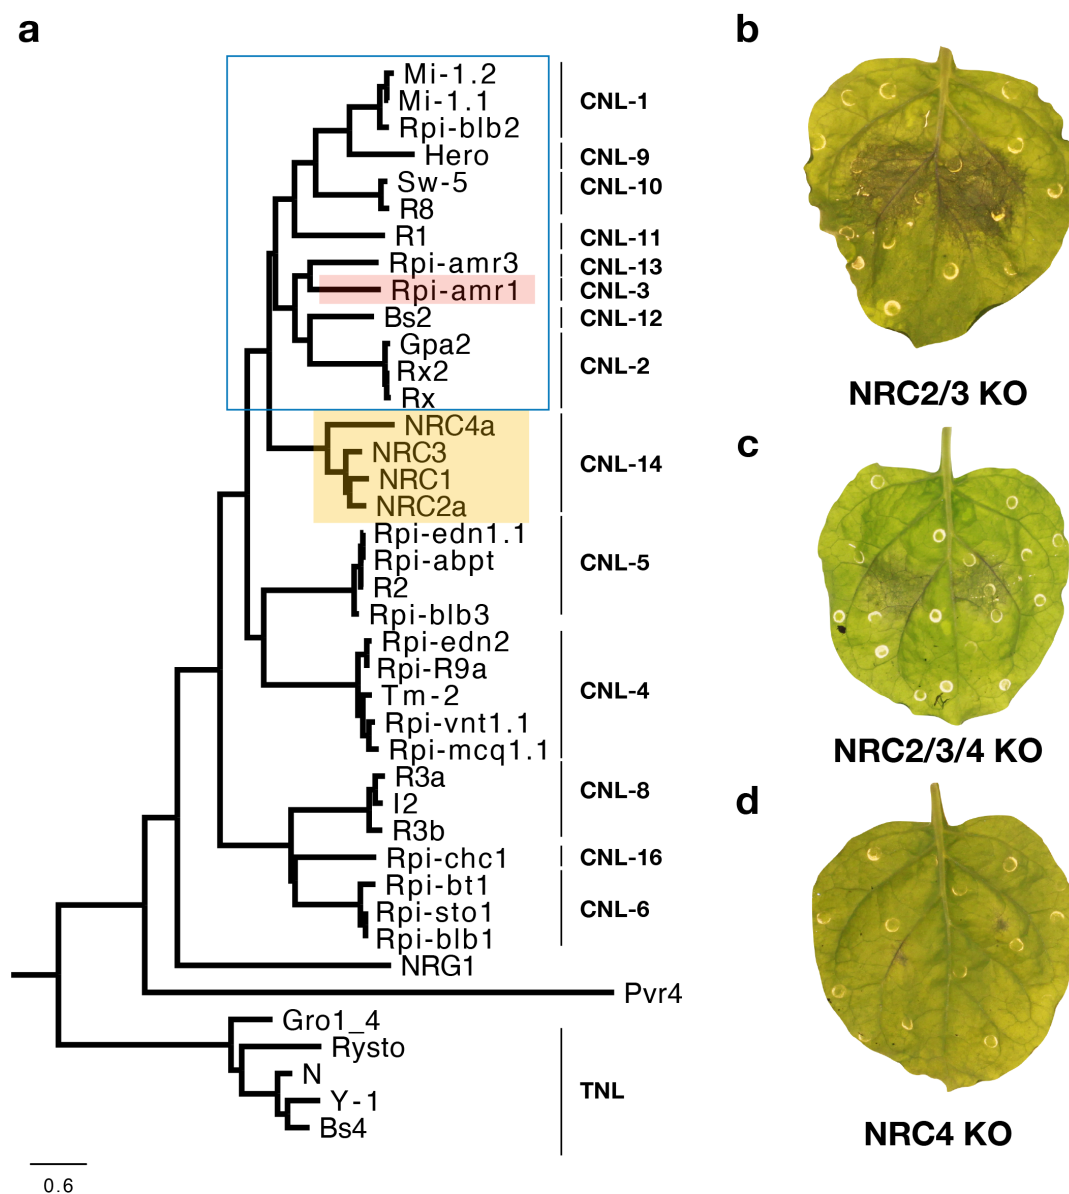

350

351 **Fig. 4. Rpi-amr1 is NRC2 or NRC3 dependent.**

352 (a) Phylogenetic analysis of Rpi-amr1 protein and other functional Solanaceae NLR proteins. The  
 353 NLR clades shown here are as described previously<sup>24</sup>, the NRC-dependent sensor clades are  
 354 marked by blue box.

355 (b) Transient expression of *Rpi-amr1-2273* in *NRC2/NRC3* double knockout *N. benthamiana*,  
 356 followed by zoospore inoculation of *P. infestans* isolate 88069, results in large necrotic lesions  
 357 indicating lack of resistance.

358 (c) Transient expression of *Rpi-amr1-2273* in *NRC2/NRC3/NRC4* triple knockout *N. benthamiana*,  
 359 followed by zoospore inoculation of *P. infestans* isolate 88069, results in large necrotic lesions  
 360 indicating lack of the resistance.

361 (d) Transient expression of *Rpi-amr1-2273* in *NRC4* knockout *N. benthamiana*, followed by  
 362 zoospore inoculation of *P. infestans* isolate 88069 results in small necrotic lesions indicating  
 363 resistance.

364

365

366 **High allelic diversity at *Rpi-amr1* was generated through inter-paralog and**  
367 **ortholog sequence exchange**

368

369 *Rpi-amr1* alleles show relatively high nucleotide diversity ( $\pi=0.04$ ), which could be an  
370 indication of balancing or diversifying selection (Table S5). In addition, *Rpi-amr1*  
371 alleles differ in their recognition of the *Avramr1* homologs (Fig. 3) which is also  
372 consistent with selection in a host-parasite co-evolutionary arms race. To test the  
373 hypothesis that allelic polymorphism at *Rpi-amr1* results from diversifying selection,  
374 we calculated diversity statistics and performed a McDonald-Kreitman test on both *Rpi-*  
375 *amr1* alleles and *Avramr1* homologs. As expected, *Avramr1* homologs show a signature  
376 consistent with balancing selection (Tajima's  $D = 2.27$ ) (Table S5). Remarkably,  
377 despite the high nucleotide diversity, no clear signals of balancing or diversifying  
378 selection were detected for *Rpi-amr1* (Tajima's  $D = 0.09083$ ) (Table S5). Aligning the  
379 *Rpi-amr1* alleles against the reference and scrutinizing the sequences in more detail  
380 provided further insights. The nucleotide similarity of alleles varies markedly across  
381 the *Rpi-amr1* homologs (Fig. 2a and Table S3); this pattern is consistent with occasional  
382 recombination between highly diverged alleles or paralogs.

383

384 To test whether recombination could explain the observed polymorphisms in *Rpi-amr1*  
385 alleles, we predicted the possible recombination events using 3SEQ. Several  
386 recombination events were detected between *Rpi-amr1* orthologs from different *S.*  
387 *americanum* accessions, and *Rpi-amr1* paralogs from SP2273 (Table S6). Some  
388 sequence exchanges were visualized using HybridCheck (Fig. S5)<sup>36</sup>, and these data  
389 suggest that sequence exchange occurred between functional *Rpi-amr1* alleles and  
390 paralogs. To confirm these findings, we mapped all cloned *Rpi-amr1* CDS back to the  
391 BAC\_5G sequence from accession SP2273 (Fig. S6). As expected, some *Rpi-amr1*  
392 homologs (e.g. SP2300 and SP2272) show a perfect match with the fourth NLR, and  
393 show a distribution of high identity that reflects the intron-exon structure. For some  
394 homologs (e.g. 2271), 5' end sequences match different NLR sequences on the  
395 BAC\_5G and for others (e.g. 2275) part of the sequence is highly diverged from  
396 BAC\_5G. Taken together, our results indicate that the polymorphism of *Rpi-amr1*  
397 alleles appears to have arisen partly due to sequence exchange between highly diverged  
398 alleles and paralogs, and not just through mutation accumulation.



## 399 Discussion

400

401 Achieving durable resistance is the ultimate goal of resistance breeding. Here, we report  
402 significant progress towards durable resistance against potato late blight. Most cloned  
403 late blight resistance genes derive from wild potatoes, and many have been overcome  
404 by one or more *P. infestans* strains<sup>37</sup>. Conceivably, resistance to *P. infestans* in nearly  
405 all *S. americanum* and *S. nigrum* accessions is due to multiple *NLR* genes, as zoospores  
406 from *P. infestans* can germinate on *S. nigrum* leaves but penetration is stopped by strong  
407 HR<sup>29,38</sup>. *Rpi* genes from plant species that only rarely support pathogen growth have  
408 likely not participated, or are no longer participating, in an evolutionary arms race with  
409 *P. infestans*, and hence, the pathogen's effectors have not (yet) evolved to evade  
410 detection by these *Rpi* genes. Under this scenario, a pre-existing standing variation in  
411 the pathogen for overcoming such *Rpi* genes is either absent or extremely rare. This  
412 makes such genes promising candidates for provision of broad-spectrum and durable  
413 late blight resistance, provided they are not deployed alone which facilitates one-step  
414 genetic changes in the pathogen to evade them, but rather in combination with other  
415 genes, as in the source plant<sup>39</sup>.

416

417 We report here a novel, broad-spectrum *S. americanum* resistance gene, *Rpi-amr1*. We  
418 also identified eight additional *Rpi-amr1* alleles from different *S. americanum*  
419 accessions and relatives, including one *Rpi-amr1* allele that translocated to the long arm  
420 of chromosome 1. Allele mining also suggested the presence of *Rpi-amr1* homologs in  
421 *S. nigrum*. All nine cloned *Rpi-amr1* alleles confer late blight resistance in transient  
422 assays in *N. benthamiana*, and both *Rpi-amr1-2272* and *Rpi-amr1-2273* in potato cv  
423 Maris Piper background confer resistance to all 19 tested *P. infestans* isolates from  
424 different countries, many of which overcome other *Rpi* genes. Thus, *Rpi-amr1* is widely  
425 distributed in germplasm of *S. americanum*, its relatives and *S. nigrum*, and may  
426 contribute to the resistance of nearly all accessions to *P. infestans*.

427

428 Many plant *R* genes and their corresponding *Avr* genes evolved differential recognition  
429 specificities with extensive allelic series for both *R* gene and *Avr* genes. Examples  
430 include *ATR1* and *RPP1* or *ATR13* and *RPP13* from *Hyaloperonospora arabidopsidis*  
431 and *Arabidopsis*<sup>9</sup>, *Avr567* and *L* genes from the rust *Melampsora lini* and flax<sup>40</sup>, and

432 multiple and diverse recognized effectors from barley powdery mildew and *Mla* from  
433 barley. In the same manner, *Avramr1* and its homologs from several *P. infestans* races<sup>25</sup>  
434 were found to be differentially recognized by high allelic variation at the *Rpi-amr1* gene.  
435 Remarkably though, the nucleotide diversity of the *R* gene did not show any of the  
436 hallmarks of diversifying or balancing selection.

437

438 Rather than through mutation accumulation, the high allelic variation observed at *Rpi-*  
439 *amr1* appears to have been generated partly by recombination between significantly  
440 diverged alleles and paralogs. The recombination events are likely to be rare relative to  
441 the mutation rate, given that the alleles carry many polymorphisms. This evolutionary  
442 scenario can explain the observed mosaic-like structure of high and low sequence  
443 similarities when the *Rpi-amr1* alleles were mapped against the contig based on two  
444 overlapping BAC clones. The deep coalescence of alleles that is implicit in this scenario  
445 can be generated by balancing selection, but we did not find evidence of such selection  
446 when analysing the nucleotide substitution patterns. Recombination between *Rpi-amr1*  
447 alleles could have eroded this signature of selection, as has been observed also in *Rpl*  
448 resistance genes in grasses<sup>41</sup> and in the vertebrate immune genes of the major  
449 histocompatibility complex (MHC)<sup>42,43</sup>. Nucleotide sequence diversity across the *Rpi-*  
450 *amr1* alleles is correlated with only slight differences in *Avramr1* recognition  
451 specificity. *Rpi-amr1* alleles can even recognize multiple *Avramr1* paralogs from a  
452 single *P. infestans* strain, a scenario that might elevate durability of resistance. Since  
453 the *S. americanum* population recognizes multiple *Avramr1* alleles and paralogs, small  
454 mutational changes in *Avramr1* gene are unlikely to suffice to escape detection, which  
455 makes resistance-breaking less likely, thus promoting evolutionary durability of *Rpi-*  
456 *amr1*. We hypothesise that this enhanced recognition capacity could be key to the  
457 evolution of “non-host” resistance, offering an escape from the coevolutionary arms  
458 race. Conceivably, stacking *Rpi-amr1* alleles *in cis* could extend the recognition  
459 specificities, which could potentially lead to even more durable late blight resistance.

460

461 Intriguingly, two *Avramr1* homologs from *P. parasitica* and *P. cactorum* are  
462 recognized by all *Rpi-amr1* homologs. Presumably, these genes have been under even  
463 less selection pressure to evade *Rpi-amr1* recognition. This result indicates that *Rpi-*  
464 *amr1* has the potential to provide “non-host” type resistance in *S. americanum* against  
465 multiple oomycete pathogens like *P. parasitica* and *P. cactorum*, which can infect a

466 wide range of hosts. As both the resistance and effector recognition of *Rpi-amr1* are  
467 *NRC2* or *NRC3* dependent, co-expression of *NRC2* or *NRC3* with *Rpi-amr1* might  
468 enable it to confer resistance to other *Phytophthora* species outside the *Solanaceae*.

469

470 In summary, we cloned *Rpi-amr1*, a broad-spectrum *Rpi* gene that contributes to the  
471 strong resistance of nearly all *S. americanum* accessions to late blight. The apparent  
472 redundancy across the *Rpi-amr1* gene family may serve an evolutionary function by  
473 broadening the scope for recognizing multiple *Avramr1* alleles and paralogs, and  
474 potentially reducing the probability of evolution of resistance-breaking strains.  
475 Stacking this type of *Rpi* gene with additional *Rpi* genes might help to turn host plants  
476 such as potato into non-hosts for late blight, enabling broad-spectrum and durable  
477 resistance.

478

479

480

481

## 482 **Methods**

483 Methods and associated references are in supplementary information.

484

## 485 **Accession codes**

486 Supporting raw reads and annotated BAC sequences were deposited in European Nucleotide

487 Archive (ENA) under project number PRJEB38240.

488

## 489 **References**

490

- 491 1. World Food and Agriculture - *Statistical Pocketbook 2019*, 1–254 (2019).
- 492 2. Saville, A. *et al.* Fungicide sensitivity of U.S. genotypes of *Phytophthora infestans*  
493 to six oomycete-targeted compounds. *Plant Disease* **99**, 659–666 (2015).
- 494 3. Malcolmson, J. F. & Black, W. New *R* genes in *Solanum demissum* Lindl. And  
495 their complementary races of *Phytophthora infestans* (Mont.) de Bary. *Euphytica*  
496 **15**, 199–203 (1966).
- 497 4. Rodewald, J. & Trognitz, B. *Solanum* resistance genes against *Phytophthora*  
498 *infestans* and their corresponding avirulence genes. *Molecular Plant Pathology*  
499 **14**, 740–757 (2013).
- 500 5. Jones, J. D. G., Vance, R. E. & Dangl, J. L. Intracellular innate immune  
501 surveillance devices in plants and animals. *Science* **354**, aaf6395 (2016).
- 502 6. Wu, C.H. *et al.* NLR network mediates immunity to diverse plant pathogens.  
503 *Proceedings of the National Academy of Sciences* **114**, 8113–8118 (2017).
- 504 7. Fry, W. *Phytophthora infestans*: the plant (and *R* gene) destroyer. *Molecular Plant*  
505 *Pathology* **9**, 385–402 (2008).
- 506 8. Jones, J. D. G. & Dangl, J. L. The plant immune system. *Nature* **444**, 323–329  
507 (2006).
- 508 9. Rehmany, A. P. *et al.* Differential recognition of highly divergent downy mildew  
509 avirulence gene alleles by *RPP1* resistance genes from two *Arabidopsis* lines. *The*  
510 *Plant Cell* **17**, 1839–1850 (2005).
- 511 10. Vleeshouwers, V. G. A. A. *et al.* Effector genomics accelerates discovery and  
512 functional profiling of potato disease resistance and *Phytophthora infestans*  
513 avirulence genes. *PLoS ONE* **3**, e2875 (2008).
- 514 11. Haas, B. J. *et al.* Genome sequence and analysis of the Irish potato famine  
515 pathogen *Phytophthora infestans*. *Nature* **461**, 393–398 (2009).
- 516 12. Armstrong, M. R. *et al.* An ancestral oomycete locus contains late blight  
517 avirulence gene *Avr3a*, encoding a protein that is recognized in the host cytoplasm.  
518 *Proceedings of the National Academy of Sciences* **102**, 7766–7771 (2005).
- 519 13. Stam, R., Silva Arias, G. A. & Tellier, A. Subsets of *NLR* genes show differential  
520 signatures of adaptation during colonization of new habitats. *New Phytol* **224**,  
521 367–379 (2019).
- 522 14. Van de Weyer, A.L. *et al.* A species-wide inventory of *NLR* genes and alleles in  
523 *Arabidopsis thaliana*. *Cell* **178**, 1260–1272.e14 (2019).

- 524 15. McDowell, J. M. *et al.* Intragenic recombination and diversifying selection  
525 contribute to the evolution of downy mildew resistance at the *RPP8* locus of  
526 *Arabidopsis*. *Plant Cell* **10**, 1861–1874 (1998).
- 527 16. Liu, J. *et al.* Genetic variation and evolution of the *Pi9* blast resistance locus in the  
528 AA genome *Oryza* species. *J. Plant Biol.* **54**, 294–302 (2011).
- 529 17. Ellis, J. G., Lawrence, G. J., Luck, J. E. & Dodds, P. N. Identification of regions  
530 in alleles of the flax rust resistance gene *L* That determine differences in gene-for-  
531 gene specificity. *Plant Cell* **11**, 495–506 (1999).
- 532 18. Seeholzer, S. *et al.* Diversity at the *Mla* powdery mildew resistance locus from  
533 cultivated barley reveals sites of positive selection. *MPMI* **23**, 497–509 (2010).
- 534 19. Saur, I. M. *et al.* Multiple pairs of allelic MLA immune receptor-powdery mildew  
535 AVRAs argue for a direct recognition mechanism. *eLife* **8**, 1957 (2019).
- 536 20. Anderson, C. *et al.* Genome analysis and avirulence gene cloning using a high-  
537 density RADseq linkage map of the flax rust fungus, *Melampsora lini*. *BMC*  
538 *Genomics* **17**, 1–20 (2016).
- 539 21. Jupe, F. *et al.* Resistance gene enrichment sequencing (RenSeq) enables  
540 reannotation of the *NB-LRR* gene family from sequenced plant genomes and rapid  
541 mapping of resistance loci in segregating populations. *The Plant Journal* **76**, 530–  
542 544 (2013).
- 543 22. Thilliez, G. J. A. *et al.* Pathogen enrichment sequencing (PenSeq) enables  
544 population genomic studies in oomycetes. *New Phytol* **4**, 903 (2018).
- 545 23. Jouet, A. *et al.* *Albugo candida* race diversity, ploidy and host-associated microbes  
546 revealed using DNA sequence capture on diseased plants in the field. *New Phytol*  
547 **93**, 959 (2018).
- 548 24. Witek, K. *et al.* Accelerated cloning of a potato late blight–resistance gene using  
549 RenSeq and SMRT sequencing. *Nature Biotechnology* **34**, 656–660 (2016).
- 550 25. Lin, X. *et al.* Identification of *Avramr1* from *Phytophthora infestans* using long  
551 read and cDNA pathogen-enrichment sequencing (PenSeq). Preprint at:  
552 <https://doi.org/10.1101/2020.05.14.095158> (2020).
- 553 26. Kamoun, S., van West, P., Vleeshouwers, V. G. A. A., de Groot, K. E. & Govers,  
554 F. Resistance of *Nicotiana benthamiana* to *Phytophthora infestans* is mediated by  
555 the recognition of the elicitor protein INF1. *The Plant Cell* **10**, 1413–1425 (1998).
- 556 27. Grund, E., Tremousaygue, D. & Deslandes, L. Plant NLRs with integrated  
557 domains: unity makes strength. *Plant Physiol.* **179**, 1227–1235 (2019).
- 558 28. Xu, X. *et al.* Genome sequence and analysis of the tuber crop potato. *Nature* **475**,  
559 189–195 (2011).
- 560 29. Colon, I. T. *et al.* Resistance to potato late blight (*Phytophthora infestans* (Mont.)  
561 de Bary) in *Solanum nigrum*, *S. villosum* and their sexual hybrids with *S.*  
562 *tuberosum* and *S. demissum*. *Euphytica* **66**, 55–64 (1993).
- 563 30. Lebecka, R. Host–pathogen interaction between *Phytophthora infestans* and  
564 *Solanum nigrum*, *S. villosum*, and *S. scabrum*. *Eur J Plant Pathol* **120**, 233–240  
565 (2007).
- 566 31. Poczai, P. & Hyvönen, J. On the origin of *Solanum nigrum*: can networks help?  
567 *Mol Biol Rep* **38**, 1171–1185 (2010).
- 568 32. Champouret, N. *et al.* *Phytophthora infestans* isolates lacking class I *ipiO* variants  
569 are virulent on *Rpi-blb1* potato. *MPMI* **22**, 1535–1545 (2009).
- 570 33. Cooke, D. E. L. *et al.* Genome analyses of an aggressive and invasive lineage of  
571 the Irish potato famine pathogen. *PLoS Pathog* **8**, e1002940 (2012).
- 572 34. Adachi, H. *et al.* An N-terminal motif in NLR immune receptors is functionally  
573 conserved across distantly related plant species. *eLife* **8**, 121 (2019).

- 574 35. Wu, C.H. *et al.* *NRC4* Gene cluster Is not essential for bacterial flagellin-triggered  
575 immunity. *Plant Physiol.* **182**, 455–459 (2020).
- 576 36. Ward, B. J. & van Oosterhout, C. HYBRIDCHECK: software for the rapid  
577 detection, visualization and dating of recombinant regions in genome sequence  
578 data. *Molecular Ecology Resources* **16**, 534–539 (2016).
- 579 37. Vleeshouwers, V. G. A. A. *et al.* Understanding and exploiting late blight  
580 resistance in the age of effectors. *Annu. Rev. Phytopathol.* **49**, 507–531 (2011).
- 581 38. Vleeshouwers, V. G. A. A., van Dooijeweert, W., Govers, F., Kamoun, S. &  
582 Colon, L. T. The hypersensitive response is associated with host and nonhost  
583 resistance to *Phytophthora infestans*. *Planta* **210**, 853–864 (2000).
- 584 39. Jones, J. D. G. *et al.* Elevating crop disease resistance with cloned genes. *Philos.*  
585 *Trans. R. Soc. Lond., B, Biol. Sci.* **369**, 20130087–20130087 (2014).
- 586 40. Dodds, P. N. *et al.* Direct protein interaction underlies gene-for-gene specificity  
587 and coevolution of the flax resistance genes and flax rust avirulence genes.  
588 *Proceedings of the National Academy of Sciences* **103**, 8888–8893 (2006).
- 589 41. Jouet, A., McMullan, M. & van Oosterhout, C. The effects of recombination,  
590 mutation and selection on the evolution of the *Rpl* resistance genes in grasses.  
591 *Mol. Ecol.* **24**, 3077–3092 (2015).
- 592 42. Ohta, T. Gene conversion vs point mutation in generating variability at the antigen  
593 recognition site of major histocompatibility complex loci. *Journal of Molecular*  
594 *Evolution* **41**, 115–119 (1995).
- 595 43. Spurgin, L. G. *et al.* Gene conversion rapidly generates major histocompatibility  
596 complex diversity in recently founded bird populations. *Mol. Ecol.* **20**, 5213–5225  
597 (2011).
- 598

599

## 600 **Acknowledgements**

601 This research was financed from BBSRC grant BB/P021646/1 and the Gatsby Charitable  
602 Foundation. This research was supported in part by the NBI Computing infrastructure for  
603 Science (CiS) group through the provision of a High-Performance Computing Cluster. We  
604 would like to thank TSL bioinformatics team, transformation team and horticultural team for  
605 their support. We thank Experimental Garden and Genebank of Radboud University, Nijmegen,  
606 The Netherlands, IPK Gatersleben, Germany and Sandra Knapp (Natural History Museum,  
607 London, UK) for access to *S. americanum*, *S. nigrescens* and *S. nigrum* genetic diversity, and  
608 Geert Kessel, Francine Govers and Paul Birch for providing *P. infestans* isolates.

609

## 610 **Author contributions:**

611 K.W., X.L., F.J., R.S., C.O. and J.D.G.J. designed the study. K.W., X.L., H.S.K., F.J., A.I.W.,  
612 S.B., W.B., L.T. and T.S., performed the experiments. K.W., X.L., H.S.K., F.J., A.I.W., B.S.,  
613 R.S., C.O., S.F., and J.M.C. analysed the data. K.W., X.L., H.S.K., F.J. and J.D.G.J. wrote the  
614 manuscript with input from all authors. V.G.A.A.V., B.B.H.W., C.-H.W., H.A. and S.K.

615 contributed resources. K.W., X.L and H.S.K. made equivalent contributions and should be  
616 considered joint first authors. All authors approved the manuscript.

617

### 618 **Conflict of interest:**

619 K.W., H.S.K., F.G.J. and J.D.G.J. are named inventors on a patent application  
620 (PCT/US2017/066691) pertaining to *Rpi-amr1* that was filed by the 2Blades Foundation on  
621 behalf of the Sainsbury Laboratory.

622

### 623 **Supplementary files:**

624

625 **Fig. S1:** Alignment of *Rpi-amr1* proteins, including non-functional homolog from SP2271.

626 **Fig. S2:** Alignment of *Rpi-amr1-2273* and *Rpi-amr1* DNA sequences from *S. nigrum*.

627 **Fig. S3:** Genotypes and phenotypes of *NRC2/3* knockout *N. benthamiana*. (a). Amplicon  
628 sequencing results of the *NRC* loci of the *NRC2/3* knockout *N. benthamiana* line *nrc23\_1.3.1*.  
629 Sequences of the sgRNAs are marked in red; (b). The *NRC2/3* knockout line (*nrc23\_1.3.1*) did  
630 not exhibit any growth defects when compared to the wild type plants. Six-week-old wild type  
631 and *NRC2/3* knockout *N. benthamiana* lines were used in the photograph.

632 **Fig. S4:** The effector recognition of *Rpi-amr1* is *NRC2* or *NRC3* dependent. The *Rpi-amr1*  
633 and *Pp-AvrAmr1* were co-expressed by agro-infiltration on (a) wild type *N. benthamiana*; (b)  
634 *NRC2/3/4* knockout line; (c) *NRC2/3* knockout line and (d) *NRC4* knockout line. *NRC2*, *NRC3*  
635 or *NRC4* were co-expressed with *Rpi-amr1* or *Pp-AvrAmr1* on different knockout lines. *Rpi-*  
636 *amr1-2273* or *AvrAmr1* alone were used as negative controls.

637 **Fig. S5:** Sequence exchange between *Rpi-amr1* homologs. Sequence exchange events were  
638 visually checked and highlighted (b and d) or identified by HybridCheck (a and c). For  
639 HybridCheck, sequence similarity was visualised using the colours of an RGB colour triangle  
640 (top); deviation from the default red, green and blue at positions with the same colour indicates  
641 regions where two sequences share the same polymorphisms, which is indicative of intra- or  
642 inter-locus recombination. Line plot shows the percentage of SNPs shared at informative sites  
643 between sequences in each of the three pairwise combinations for the triplet.

644 **Fig. S6:** Cloned *Rpi-amr1* CDS were mapped back to BAC\_5G using BLAT and visualized  
645 on the BAC sequence using the Sushi package.

646

647 **Table S1:** Linked RAD markers identified based on tomato reference genome.

648 **Table S2:** Molecular markers used in this study.

649 **Table S3:** Amino acid sequence similarity between *Rpi-amr1* homologs.

650 **Table S4:** *S. nigrum* accessions used in this study.

651 **Table S5:** Tajima's D analysis of *Rpi-amr1* and *Avramr1* homologs.

652 **Table S6:** Evidence of sequence exchange between *Rpi-amr1* orthologs and paralogs from  
653 SP2273 using 3SEQ.

654

655

656

657

658

659

660

661

662

663

664

665

666

667

668

669

670

671

672

673

674

675

676

677

678

679

680



## 681 **Supplementary Materials and Methods:**

682

### 683 **Development of mapping populations**

684

685 14 *P. infestans* resistant diploid *Solanum americanum* and relatives were used in this study  
686 (Table 1). The F1 populations were generated by crossing with a susceptible *Solanum*  
687 *americanum* accession 954750186 (working name SP2271) as a female parent. Heterozygous  
688 F1 progeny was allowed to self-pollinate to generate F2 segregating populations, or further  
689 back-crossed to the susceptible parent and allowed to self-pollinate until resistance to *P.*  
690 *infestans* co-segregated as a monogenic trait.

691

### 692 ***P. infestans* infection assay**

693

694 *P. infestans* isolates were cultured on rye and sucrose agar (RSA) medium at 18 °C for 10 days.  
695 Sporangia were washed off with cold water and incubated at 4°C for 1-2 h to induce zoospore  
696 release. Detached leaves were inoculated on the abaxial side with 10 µl droplets of zoospore  
697 suspension (50-100,000 per ml). The inoculated leaves were incubated at 18°C in high  
698 humidity under 16 h day/8 h night photoperiod conditions. Disease scoring was done at 5-7  
699 days after infection.

700

### 701 **DNA and RNA extraction**

702

703 RenSeq experiments (both short- and long-reads protocols) were conducted on gDNA freshly  
704 extracted from young leaves using the DNeasy Plant Mini Kit (Qiagen) according to the  
705 manufacturer's protocol. For the cDNA RenSeq experiment, RNA was extracted using TRI-  
706 Reagent (Sigma-Aldrich, MO, USA) and Direct-zol RNA MiniPrep Kit (Zymo Research, CA,  
707 USA), following manufacturer's recommendations.

708

### 709 **Mapping of *Rpi-amr1***

710

711 To map the underlying resistance gene from the resistant parent 954750184 (working name  
712 SP2273), we generated an F2 segregating population which was phenotyped with *P. infestans*  
713 isolates EC1\_3626 and 06\_3928A. Selected resistant plants were self-pollinated and up to 100

714 plants from F3 populations were screened for resistance and susceptibility with *P. infestans*  
715 isolates EC1\_3626 and 06\_3928A. gDNA from susceptible F2 and F3 plants (BS pool), as well  
716 as gDNA from the resistant (R) and susceptible parent (S) were subjected to RenSeq using  
717 Solanaceae bait library<sup>1</sup> and sequenced with Illumina GAI 76 bp paired-end reads. Pre-  
718 processing, assembly, mapping and SNP calling was performed as described earlier<sup>1,2</sup>.

719

720 The same gDNA samples were used in a RAD-seq experiment using PstI digestion and  
721 Illumina HiSeq sequencing, which was outsourced to Floragenex Inc. (OR, USA).  
722 Bioinformatic analysis was also performed by Floragenex using *Solanum lycopersicum*  
723 genome as a reference<sup>3</sup>. SNP calling resulted in sixteen polymorphic sites with eleven of them  
724 locating at the top of chromosome 11 (Supplementary table 1). The remaining ones were  
725 randomly distributed on chromosomes 4 and 1.

726

727 We additionally outsourced Whole Genome Shotgun sequencing (WGS) of R and S samples  
728 to BGI (BGI, Shenzhen, China) for ~30 deep Illumina HiSeq sequencing with 100PE. Reads  
729 from the resistant parent were assembled as described in<sup>2</sup> and we used our previously published  
730 *in silico* trait mapping pipelines to perform SNP calling and detection of polymorphisms linked  
731 to disease resistance<sup>1,2</sup>. Contigs polymorphic between R and S parents were further aligned to  
732 the DM reference genome to identify their position.

733

734 Screening a set of markers derived from these three approaches on gDNA of 94 susceptible F2  
735 and F3 plants identified 12 markers linked to resistance response that flank the *R* locus between  
736 7.5 cM to one side and 4.3 cM to the other side (WGS, Table S1). Four of these markers were  
737 found to co-segregate with the resistance, and two others located around 1 cM on either side,  
738 CAPS marker RAD\_3 to the distal side and the PCR marker WGS\_1 to the proximal side  
739 (Figure 1). Both 1 cM markers were subsequently used to genotype 1,793 F2 plants, and we  
740 identified 228 recombinants (118 homozygous susceptible to one side and heterozygous to the  
741 other, 110 homozygous resistant to one side and heterozygous to the other).

742

743 The 118 informative recombinants (homozygous susceptible / heterozygous) were further  
744 genotyped using eight linked markers (Figure 1b), and tested in detached leaf assays for their  
745 response to *P. infestans* isolates EC1\_3626 and 06\_3928A. This revealed that markers CLC\_3  
746 (WGS\_3) and RAD1 are flanking with a single recombination event for each marker, and  
747 CLC\_2 (WGS\_2), 56766 and 46418 are co-segregating with the resistance locus (Figure 1b).

748 Comparison of the linkage map (Figure 1) with the potato reference genome<sup>4</sup> identified the  
749 homogeneous CNL-3 NLR gene sub-family to be within the co-segregating locus. This cluster  
750 comprises 18 members on potato reference chromosome 11.

751

### 752 **BAC clones identification and analysis**

753

754 Construction and screening of 5x BAC library from resistant parent SP2273 was outsourced to  
755 BioS&T company (Quebec, Canada). Two candidate BAC clones (5G and 12H) were  
756 identified in PCR screen with WGS\_2 marker-specific primers. BAC sequencing with RSII  
757 PacBio platform and bioinformatic analysis was outsourced to Earlham Institute (Norwich,  
758 UK); both BACs were assembled into single contigs with length of 125,327 bp (5G) and  
759 144,006 bp (12H). While the co-segregating marker WGS\_2 was present on both BAC clones,  
760 a further co-segregating marker WGS\_3 was only present on 12H. The BACs were further  
761 assembled into one 212,773 contig (available in ENA under study number PRJEB38240).  
762 NLRs on the contig sequence were annotated using NLR-annotator<sup>5</sup> and Geneious 8.1.2 build-  
763 in ORF prediction tool. Gene models were annotated manually using cDNA RenSeq data  
764 generated from *S. americanum* accession SP2273 as described below.

765

### 766 **3' RACE**

767

768 Total RNA was extracted using RNeasy Plant Mini Kit (Qiagen) and treated with RNase-Free  
769 DNase (Qiagen) following manufacturer's instructions. First strand cDNA was synthesized  
770 from total RNA using SuperScript™ First-Strand Synthesis System for RT-PCR (Invitrogen,  
771 CA, USA) with P7-oligoDT primer. The resulting product was amplified with P7- and gene  
772 specific primers by using KAPA HiFi HotStart ReadyMix PCR Kit (Kapa Biosystems, Cape  
773 Town, SA) and cloned into pCR™-Blunt II-TOPO vector by using Zero Blunt® TOPO® PCR  
774 Cloning Kit (Invitrogen) and transformation was performed using One Shot™ TOP10  
775 Chemically Competent *E. coli* (Invitrogen). Isolation of plasmid DNA was performed with  
776 NucleoSpin® Plasmid kit (MACHEREY-NAGEL, Duren, Germany).

777

### 778 **Resistance gene enrichment sequencing (RenSeq) and Gene enrichment sequencing** 779 **(GenSeq)**

780 SMRT RenSeq, short-read RenSeq and cDNA RenSeq were performed as described  
781 previously<sup>2</sup> and enriched libraries were sequenced at Earlham Institute, Norwich, UK (PacBio  
782 RSII, Illumina MiSeq) and Novogene, Hong Kong (Illumina HiSeq).

783

784 Illumina GenSeq was performed as described above (Illumina RenSeq), except GenSeq baits<sup>6</sup>  
785 were used instead of RenSeq baits.

786

787 PacBio reads were processed and assembled using Geneious R8.1.8<sup>7</sup> as described<sup>2</sup>. NLR  
788 coding sequences were predicted with Geneious and AUGUSTUS<sup>8</sup> and annotated with NLR-  
789 parser<sup>5</sup>.

790

791 To infer linked polymorphisms, the quality control for Illumina paired-end reads was  
792 performed using Trimmomatic<sup>9</sup> with standard settings. For the RenSeq, the paired reads were  
793 mapped to PacBio-assembled contigs from the resistant parent, while GenSeq reads were  
794 mapped to the reference DM genome (PGSC\_DM\_v4.03\_pseudomolecules.fasta), using BWA  
795 mapper<sup>10</sup> with default settings. PCR duplicates and unmapped reads were removed and  
796 Mpileup files to find out potential linked SNPs were created using SAMtools<sup>11</sup>. Mpileup files  
797 were processed with VarScan<sup>12</sup> set to minimum read depth 20, minimum variant allele  
798 frequency threshold 0.1, and minimum frequency to call homozygote 0.98. The candidate SNPs  
799 were manually inspected using Savant genome browser<sup>13</sup>. TopHat<sup>14</sup> with default settings was  
800 used to map cDNA Illumina reads to assembled PacBio data. All the tools used in this study  
801 were embedded in The Sainsbury Laboratory (TSL) customized Galaxy instance, if not stated  
802 otherwise.

### 803 **Transient complementation of a candidate genes in *N. benthamiana***

804

805 The candidate genes were PCR amplified from gDNA with their own promoters (1-2  
806 kb upstream of start codon) and up to 1 kb terminator elements, and cloned into USER  
807 vector as described<sup>2</sup>. Transient complementation assays followed by *P. infestans*  
808 inoculation were performed as described<sup>2</sup>.

809

### 810 **Stable transformation of susceptible potato cultivar Maris Piper**

811

812 Stable transgenic plants with constructs carrying *Rpi-amr1-2272*, *Rpi-amr1-2273* or  
813 *Rpi-amr1a* under the control of their native regulatory elements were created in the  
814 background of potato cultivar Maris Piper as described previously<sup>15</sup>. At least 10  
815 independent transgenic lines were generated for each construct and tested for the  
816 presence of the transgene using gene specific primers. All positive *Rpi-amr1-2272* and  
817 *Rpi-amr1-2273* lines showed resistance in DLA with *P. infestans* isolate 88069, while  
818 *Rpi-amr1a* transgenic plants were fully susceptible. Selected lines of *Rpi-amr1-2272*  
819 and *Rpi-amr1-2273* were tested in DLA with 19 additional *P. infestans* isolates (Table  
820 2). WT Maris Piper plants were used as a negative control.

821

### 822 **Generation of *NRC2/3* knockout *N. benthamiana***

823

824 *NRC4* and *NRC2/NRC3/NRC4* knockout *N. benthamiana* lines were described  
825 previously<sup>16,17</sup>. Knocking out of *NRC2/NRC3* in *N. benthamiana* were performed  
826 according to the methods described previously<sup>16</sup>. Forward primers CHW\_sgNbNRCs  
827 and reverse primer JC\_sgrna\_R<sup>16</sup> were used to clone sgRNA2.1-4, sgRNA3.1-4 into  
828 Golden Gate level 1 vectors for different positions. Constructs of sgRNAs targeting *N.*  
829 *benthamiana* *NRC2* and *NRC3* were assembled into level 2 vector pICSL4723 together  
830 with pICSL11017 (pICH47732::NOSp::BAR, Addgene no. 51145) and  
831 pICH47742::35S::Cas9<sup>18</sup>. Leaf discs of *N. benthamiana* were transformed with the  
832 binary vector pICSL4723 containing the BAR selection marker gene, Cas9 expression  
833 cassette, and sgRNAs targeting *NRC2* and *NRC3*. T0 transgenic plants were selected in  
834 the medium with phosphinothricin (2 mg/L) and then transferred into the soil. The  
835 progeny of the transformants were genotyped using amplicon sequencing as described  
836 previously<sup>16</sup> (Fig. S6a). T3 populations from the selected T2 plants were used for

837 further experiments. *NRC2/3* knockout line (*nrc23\_1.3.1*) did not exhibit any growth  
838 defects when compared to the wild type plants (Fig. S6b).

839

#### 840 **Phylogenetic tree construction**

841

842 Phylogenetic tree was generated from protein sequences of the cloned *Solanaceae R*  
843 genes obtained from NCBI. Full-length sequences were aligned using ClustalW 1.74<sup>19</sup>  
844 and the alignments were imported to the MEGA7<sup>20</sup> to build a maximum-likelihood  
845 phylogenetic tree with Jones-Taylor-Thornton (JTT) substitution model and 100  
846 bootstraps.

847

#### 848 **Evolutionary analyses of *Rpi-amr1* and *Avramr1* homologs**

849

850 CDS were aligned using MUSCLE<sup>21</sup> as implemented in seaview<sup>22</sup> with and without  
851 outgroup (the closest homologs from *S. lycopersicum* and *P. capsici* for *Rpi-amr1* and  
852 *Avramr1*, respectively). Calculations of diversity statistics and the MacDonald-  
853 Kreitmann Test were executed through DNAsp5.0<sup>23</sup>; DAMBE<sup>24</sup> was used to rule out  
854 saturation. For *Rpi-amr1* homologs, the calculations were performed separately on  
855 annotated full-length sequences as well as the individual domains.

856

857 We used 3SEQ<sup>25</sup> to identify break points in the aligned CDS. To confirm gene  
858 conversion events in *Rpi-amr1*, we mapped the CDS back to the BAC\_5G sequence  
859 using BLAT (minScore 1500, minMatch 93)<sup>26</sup>. The resulting .psl files were converted  
860 into .bed files using a custom R script, prior to visualization using the R package Sushi<sup>27</sup>.

861

#### 862 **HybridCheck**

863

864 For each accession, FASTA files of all *Rpi-amr1e* orthologs or *Rpi-amr1* paralogs in  
865 combinations of three (triplets) were generated and aligned using MUSCLE v3.8.31<sup>21</sup>.  
866 The sequence triplets were analysed using HybridCheck<sup>28</sup> to detect and date  
867 recombination blocks between *Rpi-amr1* orthologs (sliding windows = 200bp) or  
868 paralogs (sliding windows = 100 bp); non-informative sites were removed from the  
869 sequence triplets. Figures showing sequence similarity were plotted (MosaicScale = 50)

870 with HybridCheck and formatted using R v3.2.0 (<https://www.r-project.org>). The  
871 colour of each sequence window was calculated based on the proportion of SNPs shared  
872 between pairwise sequences at informative sites.

873

## 874 References

875

- 876 1. Jupe, F. *et al.* Resistance gene enrichment sequencing (RenSeq) enables  
877 reannotation of the *NB-LRR* gene family from sequenced plant genomes and  
878 rapid mapping of resistance loci in segregating populations. *The Plant Journal*  
879 **76**, 530–544 (2013).
- 880 2. Witek, K. *et al.* Accelerated cloning of a potato late blight–resistance gene using  
881 RenSeq and SMRT sequencing. *Nature Biotechnology* **34**, 656–660 (2016).
- 882 3. Sato, S. *et al.* The tomato genome sequence provides insights into fleshy fruit  
883 evolution. *Nature* **485**, 635–641 (2012).
- 884 4. Xu, X. *et al.* Genome sequence and analysis of the tuber crop potato. *Nature* **475**,  
885 189–195 (2011).
- 886 5. Steuernagel, B., Jupe, F., Witek, K., Jones, J. 2015. NLR-parser: rapid annotation  
887 of plant NLR complements. *Bioinformatics* 1665–1667 (2015).
- 888 6. Chen, X. *et al.* Identification and rapid mapping of a gene conferring broad-  
889 spectrum late blight resistance in the diploid potato species *Solanum verrucosum*  
890 through DNA capture technologies. *Theor Appl Genet* **131**, 1287–1297 (2018).
- 891 7. Kears, M. *et al.* Geneious Basic: An integrated and extendable desktop software  
892 platform for the organization and analysis of sequence data. *Bioinformatics* **28**,  
893 1647–1649 (2012).
- 894 8. Stanke, M. & Morgenstern, B. AUGUSTUS: a web server for gene prediction in  
895 eukaryotes that allows user-defined constraints. *Nucleic Acids Research* **33**,  
896 W465–W467 (2005).
- 897 9. Bolger, A. M., Lohse, M. & Usadel, B. Trimmomatic: a flexible trimmer for  
898 Illumina sequence data. *Bioinformatics* **30**, 2114–2120 (2014).
- 899 10. Li, H. & Durbin, R. Fast and accurate short read alignment with Burrows-  
900 Wheeler transform. *Bioinformatics* **25**, 1754–1760 (2009).
- 901 11. Li, H. *et al.* The Sequence Alignment/Map format and SAMtools.  
902 *Bioinformatics* **25**, 2078–2079 (2009).
- 903 12. Koboldt, D. C. *et al.* VarScan 2: Somatic mutation and copy number alteration  
904 discovery in cancer by exome sequencing. *Genome Research* **22**, 568–576  
905 (2012).
- 906 13. Fiume, M., Williams, V., Brook, A. & Bioinformatics, M. B. Savant: genome  
907 browser for high-throughput sequencing data. *Bioinformatics* **25**, 1938–1944  
908 (2010).
- 909 14. Trapnell, C., Pachter, L. & Salzberg, S. L. TopHat: discovering splice junctions  
910 with RNA-Seq. *Bioinformatics* **25**, 1105–1111 (2009).
- 911 15. Kumar, A., Taylor, M. A., Arif, S. A. M. & Davies, H. V. Potato plants  
912 expressing antisense and sense S-adenosylmethionine decarboxylase (SAMDC)  
913 transgenes show altered levels of polyamines and ethylene: antisense plants  
914 display abnormal phenotypes. *The Plant Journal* **9**, 147–158 (1996).
- 915 16. Wu, C.H. *et al.* *NRC4* Gene cluster is not essential for bacterial flagellin-  
916 triggered immunity. *Plant Physiol.* **182**, 455–459 (2020).

- 917 17. Adachi, H. *et al.* An N-terminal motif in NLR immune receptors is functionally  
918 conserved across distantly related plant species. *eLife* **8**, 121 (2019).
- 919 18. Castel, B. *et al.* Diverse NLR immune receptors activate defence via the RPW8-  
920 NLR NRG1. *New Phytol* **222**, 966–980 (2019).
- 921 19. Thompson, J. D., Higgins, D. G. & Gibson, T. J. CLUSTAL W: improving the  
922 sensitivity of progressive multiple sequence alignment through sequence  
923 weighting, position-specific gap penalties and weight matrix choice. *Nucleic  
924 Acids Research* **22**, 4673–4680 (1994).
- 925 20. Kumar, S., Nei, M., Dudley, J. & Tamura, K. MEGA: A biologist-centric  
926 software for evolutionary analysis of DNA and protein sequences. *Briefings in  
927 Bioinformatics* **9**, 299–306 (2008).
- 928 21. Edgar, R. C. MUSCLE: multiple sequence alignment with high accuracy and  
929 high throughput. *Nucleic Acids Research* **32**, 1792–1797 (2004).
- 930 22. Gouy, M., Guindon, S., and, O. G. M. B.2010. SeaView version 4: a  
931 multiplatform graphical user interface for sequence alignment and phylogenetic  
932 tree building. *Mol Biol Evol* (2009).
- 933 23. Rozas, J. & Sánchez-DelBarrio, J. C. DnaSP, DNA polymorphism analyses by  
934 the coalescent and other methods. *Bioinformatics* (2009).
- 935 24. Xia, X. DAMBE: software package for data analysis in molecular biology and  
936 evolution. *Mol Biol Evol* (2013).
- 937 25. Ratmann, O., Lam, H. M. & Boni, M. F. Improved algorithmic complexity for  
938 the 3SEQ recombination detection algorithm. *Mol Biol Evol* (2017).
- 939 26. Kent, W. J. BLAT--the BLAST-like alignment tool. *Genome Research* **12**, 656–  
940 664 (2002).
- 941 27. Phanstiel DH (2020). Sushi: Tools for visualizing genomics data. R (1.26.0.)
- 942 28. Ward, B. J. & van Oosterhout, C. HYBRIDCHECK: software for the rapid  
943 detection, visualization and dating of recombinant regions in genome sequence  
944 data. *Molecular Ecology Resources* **16**, 534–539 (2016).
- 945
